# Supplementary material for: CaCO3 thin-film formation mediated by a synthetic protein-lysozyme coacervate
Source: Royal Society of Chemistry journal article supplement (doi:10.1039/c6ra28808a), 2017-01-01
Supplement: c6ra28808a1.pdf [file c6ra28808a1.pdf]

## Supplementary Information

### Circular Dichroism (CD) spectroscopy.

Far ultraviolet (UV) CD spectra of 2 mg/mL GG1234 was recorded on a Jasco-815 150-L spectropolarimeter at 20 °C in 25 mM sodium acetate buffer (pH 5.0). The obtained CD spectra was analyzed by a web server of CAPITO (<http://capito.nmr.leibniz-flf.de/>).<sup>1</sup>

1. C. Wiedemann, P. Bellstedt and M. Görlach, *Bioinformatics*, **2013**, *29*, 1750-1757.

### Supplementary Fig. 1

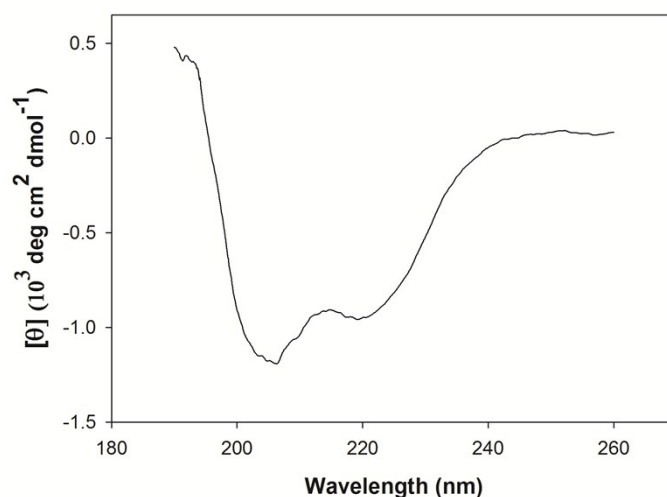

Circular Dichroism (CD) spectrum of GG1234 at pH 5.0 in 25 mM sodium acetate buffer. The spectrum was analyzed by a web server of CAPITO (<http://capito.nmr.leibniz-flf.de/>), which predicted that GG1234 contained a large amount of random coil (55%) and  $\beta$ -strand (50%) at 25 mM sodium acetate solution (pH 5.0).
